# Supplementary material for: Experiences of individuals with rheumatoid arthritis interacting with health care and the use of a digital self-care application: a qualitative interview study
Source: PubMed Central journal article supplement (PMC10748980; doi:10.1136/bmjopen-2023-072274), 2023-12-20

Example of App Content: Explore snapshots of the app's features. For more details, please visit:

<https://www.elsa.science/en/>

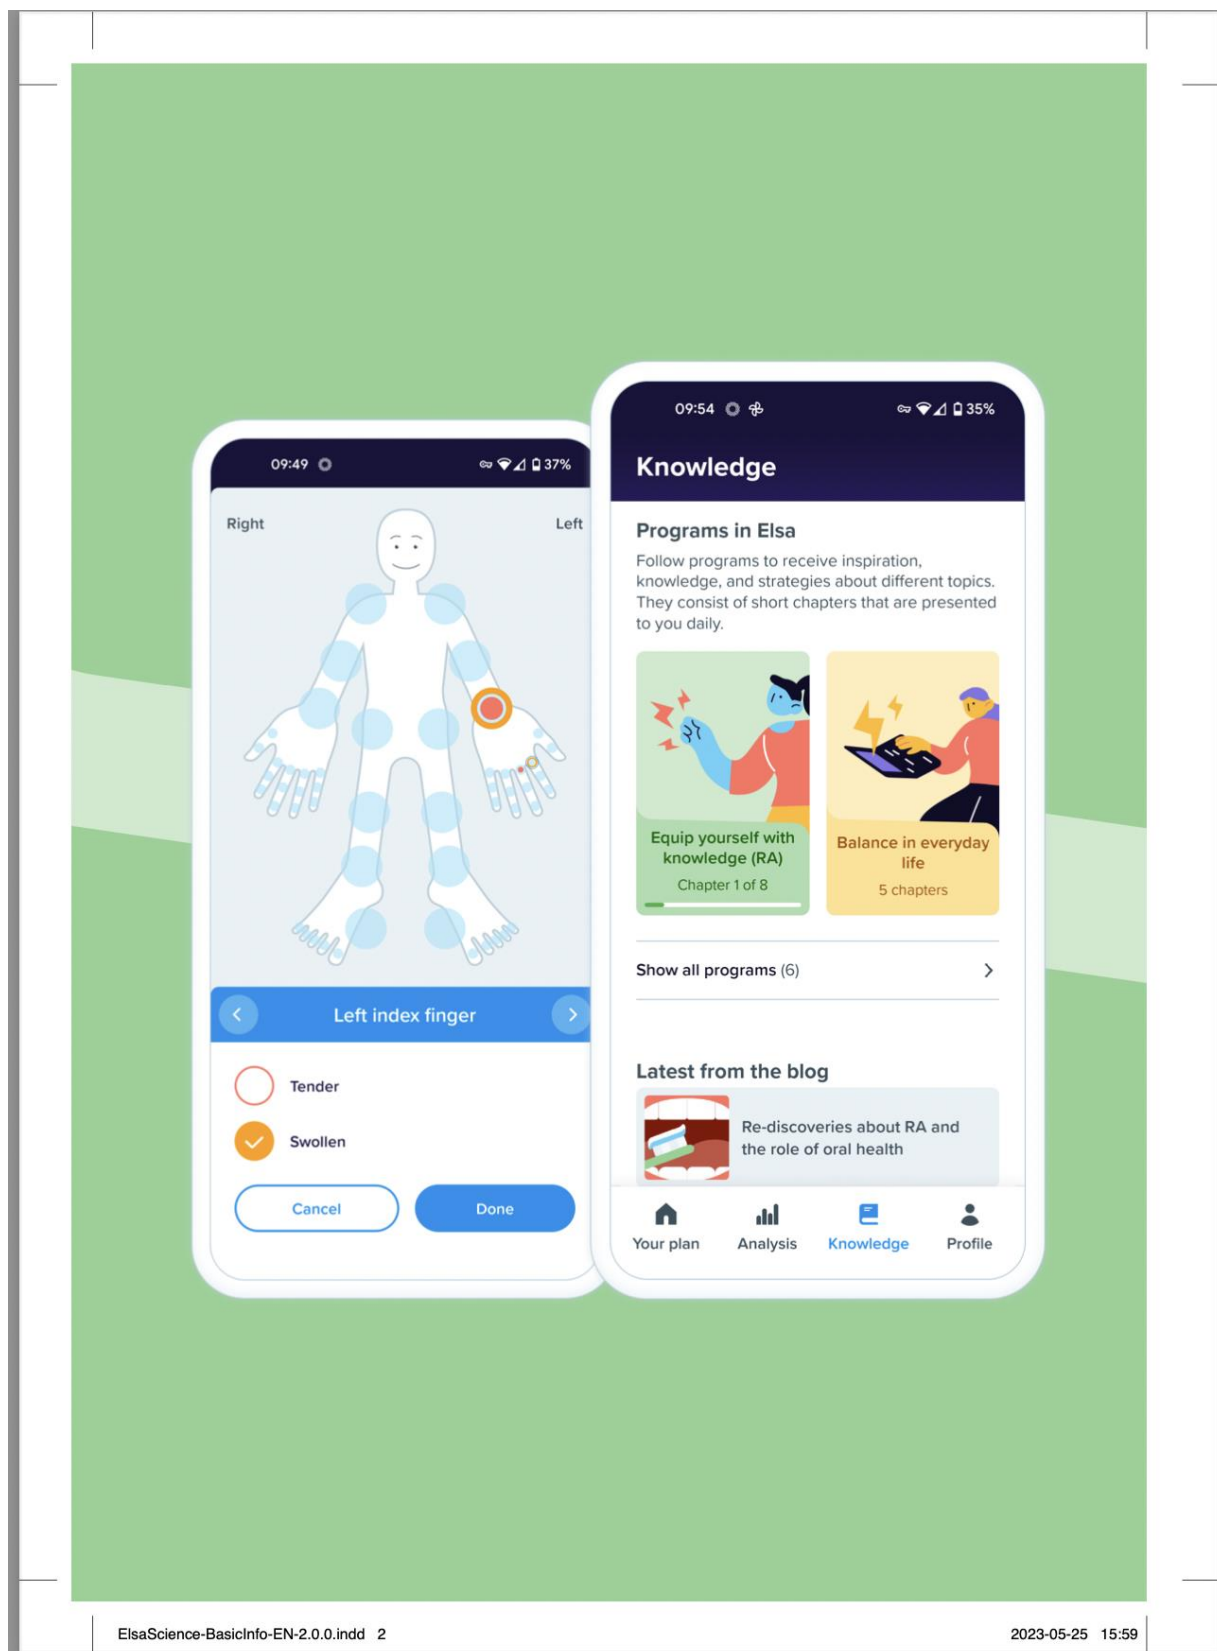

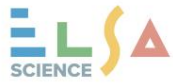

## The Self-Care App

# Rheumatic disease? This is for you.

The Elsa Science Self-Care App is your partner in managing rheumatic conditions at any stage of the disease so you can focus on quality of life.

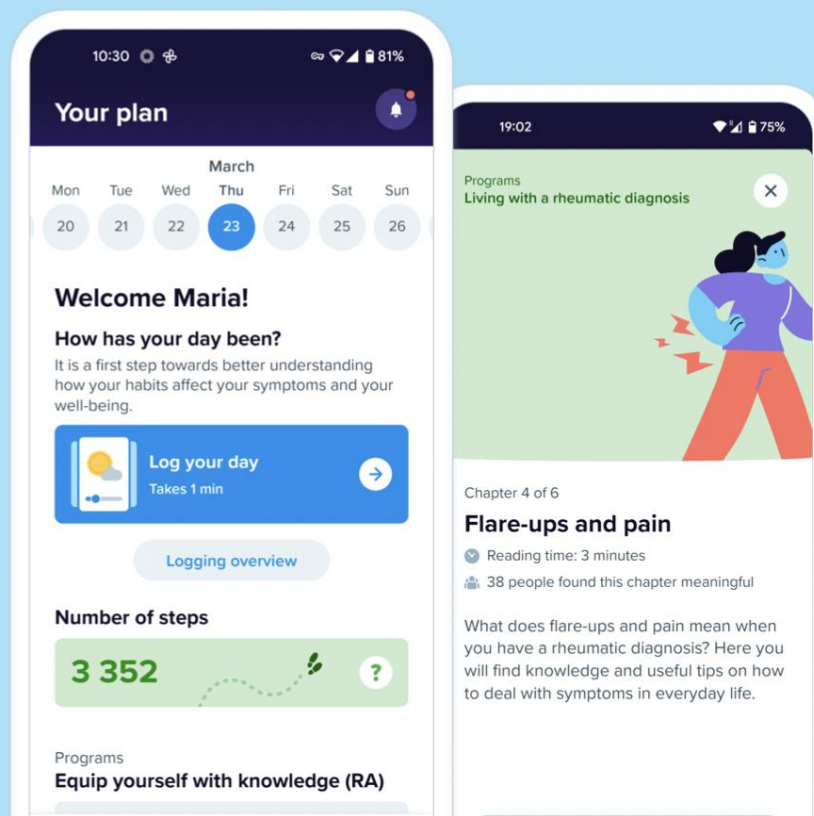

Supplement: bmjopen-2023-072274supp001.pdf [file bmjopen-2023-072274supp001.pdf]
